# Supplementary material
Source: HighWire-hosted journal article supplement (http://www.cmaj.ca/highwire/filestream/80175/field_highwire_adjunct_files/0/210507-res-1-at.pdf)
Supplement: 210507-res-1-at.pdf [file 210507-res-1-at.pdf]

## Appendix Tables

**Table S1. International Classification of Disease (ICD-9-CM) codes used to identify diabetes, hypertension, and CKD**

| Comorbidity            | ICD-9-CM Codes                                                       |
|------------------------|----------------------------------------------------------------------|
| Diabetes               | 250                                                                  |
| Chronic Kidney Disease | 403, 404, 580, 581, 582, 583, 585, 586, 587, 588, 591, 593, 753, V56 |
| Hypertension           | 401, 402, 403, 404, 405, 642, 362.11, 416.0, 437.2, 796.2            |

**Table S2. Anatomical therapeutic chemical (ATC) codes used to classify medications**

| Medication Type                                                                                          | ATC Codes          |
|----------------------------------------------------------------------------------------------------------|--------------------|
| Antihypertensives (antiadrenergic agents, diuretics, beta blocking agents, and calcium channel blockers) | C02, C03, C07, C08 |
| Angiotensin-Converting Enzyme-Inhibitors (ACEIs)/ Angiotensin Receptor II Blockers (ARBs)                | C09                |
| Antihyperglycemic                                                                                        | A10                |

**Table S3. Characteristics of the FINISHED intervention group and the comparison group (post-matching) from available administrative data.**

|                                | Intervention Group<br>(n= 324) | Comparison Group<br>(n= 648) | Standardized<br>Difference |
|--------------------------------|--------------------------------|------------------------------|----------------------------|
| Age at screening               | 12.7 ± 3.1                     | 12.6 ± 2.0                   | 0.03                       |
| Sex (% female)                 | 56.2%                          | 55.6%                        | 0.01                       |
| Dwelling Location<br>(% Rural) | 41.0%                          | 40.9%                        | -0.003                     |
| Chronic Pulmonary<br>Disease   | 7.10%                          | 6.48%                        | 0.02                       |
| Diabetes                       | 3.5%                           | 1.5%                         | 0.06                       |
| Renal Disease                  | <i>suppressed</i>              | <i>suppressed</i>            | 0                          |

*Notes.* The presence of comorbidities was assessed based on International Classification of Diseases codes taken from hospital admissions and medical claims data from within the 18 months prior to the index date (date of screening, or the pseudo-index date for the control group).

**Table S4: Rates of follow-up outpatient testing, and primary care visits by residence (n=324)**

|                                             | Rural Dwellers (n=133)                |                                        |                                    |                                                              | Remote Dwellers (n=191)               |                                        |                                    |                                                              | Difference in % change between the rural vs the remote groups <sup>b</sup> |
|---------------------------------------------|---------------------------------------|----------------------------------------|------------------------------------|--------------------------------------------------------------|---------------------------------------|----------------------------------------|------------------------------------|--------------------------------------------------------------|----------------------------------------------------------------------------|
|                                             | % in the 18 months prior to screening | % in the 18 months following screening | % Difference (95% CI) <sup>a</sup> | % with testing/care following screening, to end of databases | % in the 18 months prior to screening | % in the 18 months following screening | % Difference (95% CI) <sup>a</sup> | % with testing/care following screening, to end of databases |                                                                            |
| eGFR testing, <i>n</i> (%)                  | <i>Suppressed</i>                     | <i>Suppressed</i>                      | 11.3 (4.4, 18.2)                   | 53 (40.0)                                                    | <i>Suppressed</i>                     | <i>Suppressed</i>                      | 8.9 (0.8, 17.1)                    | 87 (45.5)                                                    | -2.4 (-13.7, 9.0)                                                          |
| UACR/UPCR testing, <i>n</i> (%)             | <i>Suppressed</i>                     | <i>Suppressed</i>                      | 6.0 (1.1, 11.0)                    | 17 (12.8)                                                    | <i>Suppressed</i>                     | <i>Suppressed</i>                      | 6.3 (0.8, 11.8)                    | 31 (16.2)                                                    | 0.3 (-7.5, 8.1)                                                            |
| HbA1c, <i>n</i> (%)                         | <i>Suppressed</i>                     | <i>Suppressed</i>                      | 3.0 (-2.0, 8.0)                    | 25 (18.8)                                                    | <i>Suppressed</i>                     | <i>Suppressed</i>                      | 7.3 (0.6, 14.1)                    | 51 (26.7)                                                    | 4.3 (-4.7, 13.4)                                                           |
| At least 1 Primary Care Visit, <i>n</i> (%) | 95 (71.4)                             | 107 (80.4)                             | 9.0 (-1.2, 19.2)                   | 124 (93.2)                                                   | 76 (39.6)                             | 86 (44.8)                              | 4.7 (-5.2, 14.6)                   | 133 (69.6)                                                   | -4.3 (-18.9, 10.3)                                                         |

<sup>a</sup> The % difference was calculated as follows: (the % frequency in the post-intervention period – the % frequency in the pre-intervention period).

<sup>b</sup> The difference in % change was calculated as follows: [(% frequency following screening in the *remote dwellers* - % frequency preceding screening in the *remote dwellers*) – (% frequency following screening in the *rural dwellers* - % frequency preceding screening in the *rural dwellers*)
